# Supplementary material
Source: Springer Nature journal article supplement (https://www.springermedizin.de/resource/supplementary/12950_2009_121_MOESM8_ESM.doc/9558042)

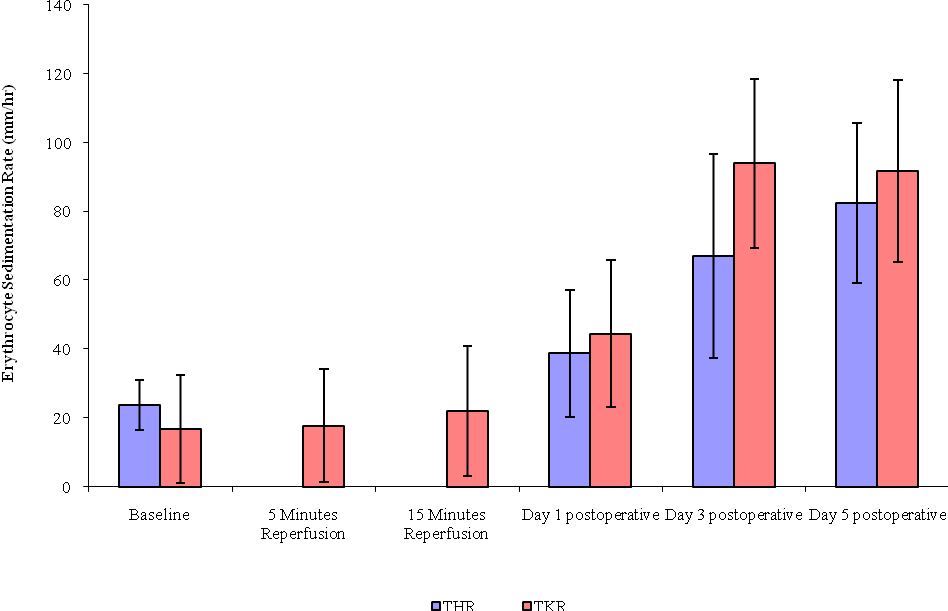
Figure 8: Effect of THR and TKR surgery on the ESR.

Supplement: MOESM8 [file 9558042]
